# Supplementary material for: Photoinduced tautomeric transformations of xanthurenic acid
Source: Royal Society of Chemistry journal article supplement (doi:10.1039/c000735h), 2010-01-01
Supplement: c000735h.pdf [file c000735h.pdf]

## Electronic Supplementary Information

**Photoinduced tautomeric transformations of xanthurenic acid by**

V.V. Yanshole, P.S. Sherin, N.P. Gritsan, O.A. Snytnikova, V.I. Mamatyuk, J. Grilj, E. Vauthey, R.Z. Sagdeev, Yu.P. Tsentalovich.

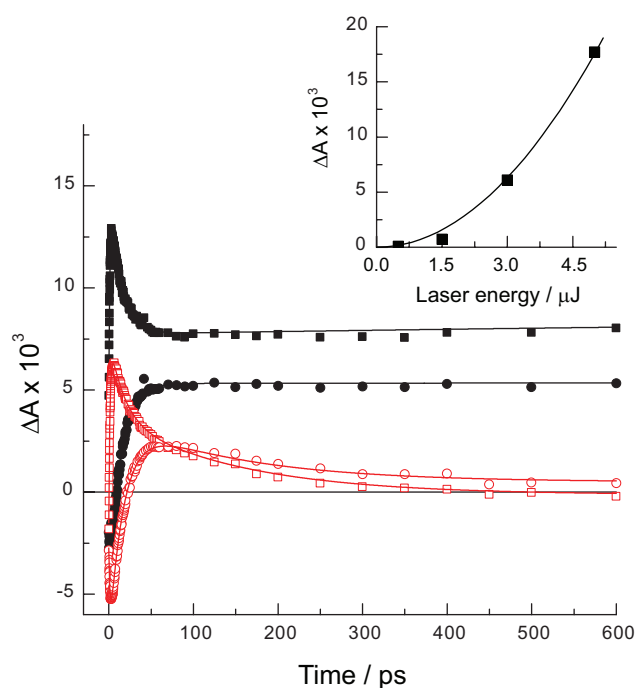

TA time profiles measured at 620 nm (squares) and 720 nm (circles) after laser pulse excitation (400 nm, 150 fs,  $3\mu\text{J}$ ) of basic aqueous XAN solution (pH 11) in the absence (solid black symbols) and presence (empty red symbols) of 1.1 M acetone. Solid lines show the best fit. Insert: the dependence of TA intensity measured at 620 nm (1.5 ns after 400 nm laser excitation, aqueous XAN solution, pH 11) on the laser energy.
